# Supplementary material
Source: PubMed Central journal article supplement (PMC3250133)
Supplement: 1117937108_sfig06.pdf [file 1117937108_sfig06.pdf]

Population average levels of DSBs or total events per chromatid

| Intrinsic probability<br>of a DSB per pair of<br>chromatids (M) | <i>Trans</i> inhibition level (K) |      |      |      |      |      |      |      |      |      |      | $\Delta$ Pop Avg  |                   |
|-----------------------------------------------------------------|-----------------------------------|------|------|------|------|------|------|------|------|------|------|-------------------|-------------------|
|                                                                 | 0                                 | 0.1  | 0.2  | 0.3  | 0.4  | 0.5  | 0.6  | 0.7  | 0.8  | 0.9  | 1    | [K=1 vs<br>K=0.5] | [K=0.5 vs<br>K=0] |
| 0                                                               | 0                                 | 0    | 0    | 0    | 0    | 0    | 0    | 0    | 0    | 0    | 0    | 0                 | 0                 |
| 0.1                                                             | 0.05                              | 0.05 | 0.05 | 0.05 | 0.05 | 0.05 | 0.05 | 0.05 | 0.05 | 0.05 | 0.05 | 0                 | 0                 |
| 0.2                                                             | 0.10                              | 0.10 | 0.10 | 0.10 | 0.10 | 0.10 | 0.09 | 0.09 | 0.09 | 0.09 | 0.09 | 0.01              | 0                 |
| 0.3                                                             | 0.15                              | 0.15 | 0.15 | 0.14 | 0.14 | 0.14 | 0.14 | 0.13 | 0.13 | 0.13 | 0.12 | 0.02              | 0.01              |
| <i>his4::URA3-arg4</i> 0.4                                      | 0.20                              | 0.20 | 0.19 | 0.19 | 0.18 | 0.18 | 0.18 | 0.17 | 0.17 | 0.16 | 0.16 | 0.02              | 0.02              |
| 0.5                                                             | 0.25                              | 0.24 | 0.23 | 0.23 | 0.23 | 0.22 | 0.21 | 0.21 | 0.20 | 0.19 | 0.19 | 0.03              | 0.03              |
| 0.6                                                             | 0.30                              | 0.29 | 0.28 | 0.27 | 0.26 | 0.26 | 0.25 | 0.24 | 0.23 | 0.22 | 0.21 | 0.05              | 0.04              |
| <i>HIS4LEU2</i> 0.7                                             | 0.35                              | 0.34 | 0.33 | 0.31 | 0.30 | 0.29 | 0.28 | 0.26 | 0.25 | 0.24 | 0.23 | 0.06              | 0.06              |
| 0.8                                                             | 0.40                              | 0.38 | 0.37 | 0.35 | 0.34 | 0.32 | 0.30 | 0.29 | 0.27 | 0.26 | 0.24 | 0.08              | 0.08              |
| 0.9                                                             | 0.45                              | 0.43 | 0.41 | 0.39 | 0.37 | 0.35 | 0.33 | 0.31 | 0.29 | 0.27 | 0.25 | 0.1               | 0.1               |
| 1                                                               | 0.50                              | 0.48 | 0.45 | 0.43 | 0.40 | 0.38 | 0.35 | 0.33 | 0.30 | 0.28 | 0.25 | 0.13              | 0.12              |

-  Observed K (Figure 4C)
-  Predicted for K = 0 (no *trans* inhibition) at observed M
-  Predicted for locus with same DSB efficiency (M) as *his4::URA3-arg4* and same strength of *trans* inhibition (K) as *HIS4LEU2*.

Supplemental Figure 6
