# Supplementary material
Source: PubMed Central journal article supplement (PMC3250133)

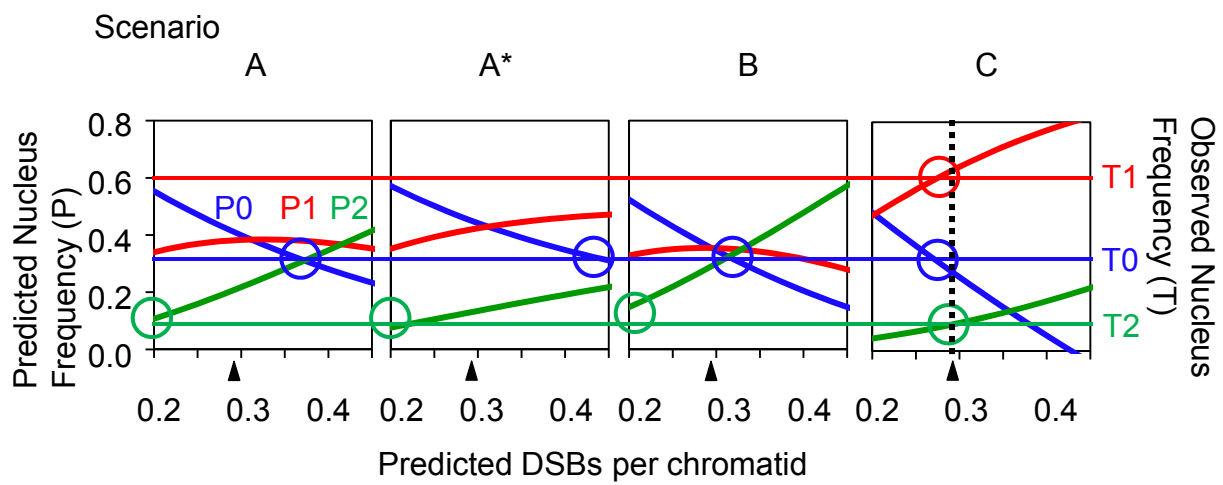

Supplemental Figure 3

Supplement: 1117937108_sfig03.pdf [file 1117937108_sfig03.pdf]

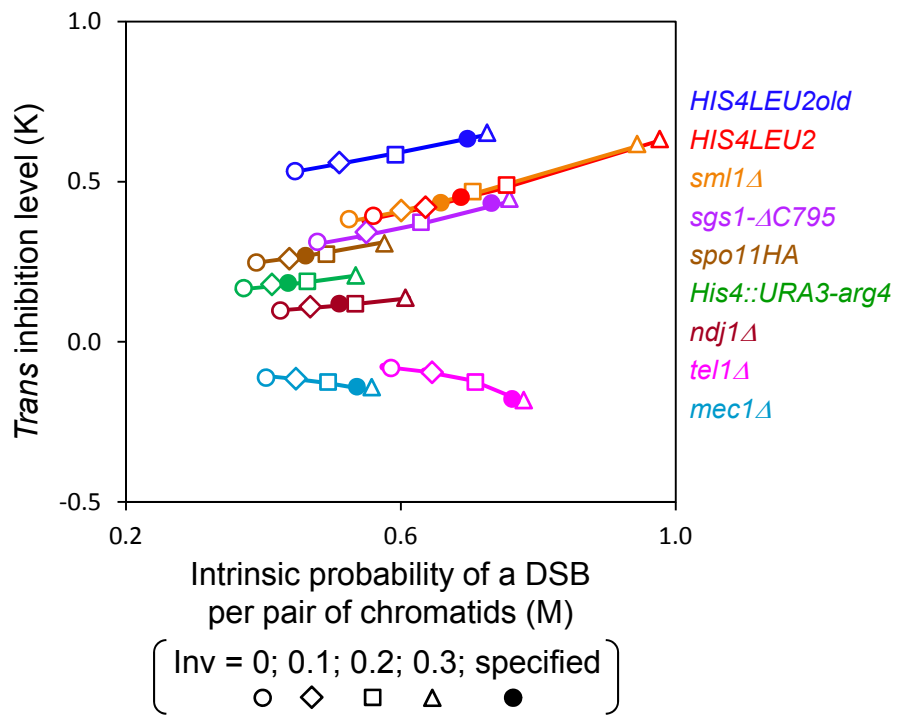

Supplemental Figure 4

Supplement: 1117937108_sfig04.pdf [file 1117937108_sfig04.pdf]

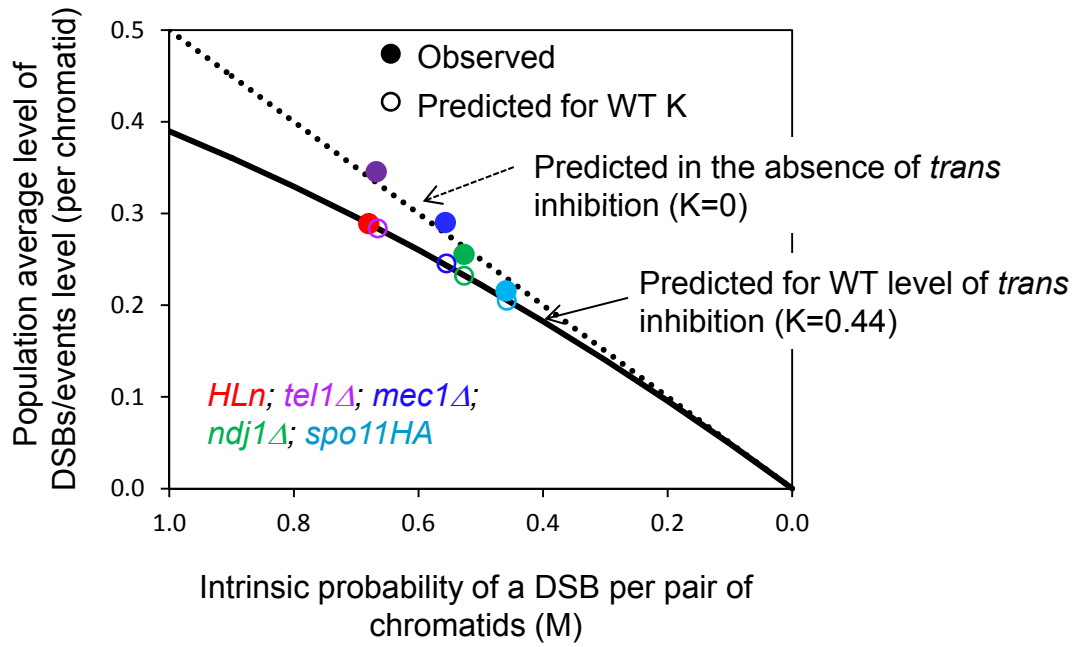

Supplemental Figure 5

Supplement: 1117937108_sfig05.pdf [file 1117937108_sfig05.pdf]
